# Supplementary material
Source: HighWire-hosted journal article supplement (https://bmjopen.bmj.com/content/11/1/e037340)
Supplement: inline-supplementary-material-1 [file inline-supplementary-material-1.pdf]

## Supplemental Data.

### Supplemental Table S1 Logistic regression analysis regarding the association between glucose metabolism status and high Gensini score (median as cut-off)

| DM category | OR (95%CI)        |                   |
|-------------|-------------------|-------------------|
|             | Crude Model       | Adjusted Model    |
| NGR         | Ref               | Ref               |
| Pre-DM      | 1.03 (0.85-1.24)  | 0.97(0.80-1.18)   |
| DM          | *1.55 (1.27-1.90) | *1.42 (1.16-1.75) |

\* for  $p < 0.05$

NGR: normal glucose regulation; Pre-DM: pre-diabetes mellitus; DM: diabetes mellitus; Model adjusted for age, sex, body mass index, smoking, hypertension, family history of coronary artery disease. Gensini score, left ventricular ejection fraction, low density lipoprotein cholesterol, triglyceride, high density lipoprotein cholesterol, high sensitive C-reactive protein and baseline statins;

**Supplemental Table S2 Logistic regression analysis regarding the association between combined status of glucose metabolism status and atherogenic dyslipidemia and high Gensini Score (median as cut-off)**

| DM/AD category        | OR (95%CI)       |                   |
|-----------------------|------------------|-------------------|
|                       | Crude Model      | Adjusted Model    |
| <b>NGR, Non-AD</b>    | Ref              | Ref               |
| <b>Pre-DM, Non-AD</b> | 0.92 (0.74-1.15) | 0.89 (0.71-1.11)  |
| <b>DM, Non-AD</b>     | *1.51(1.20-1.90) | *1.43(1.13-1.81)  |
| <b>NGR, AD</b>        | 1.01(0.69-1.48)  | 1.01(0.68-1.49)   |
| <b>Pre-DM, AD</b>     | *1.39(1.06-1.83) | *1.37(1.04-1.81)  |
| <b>DM, AD</b>         | *1.67(1.26-2.21) | *1.64 (1.23-2.19) |

NGR: normal glucose regulation; Pre-DM: pre-diabetes mellitus; DM: diabetes mellitus; AD: atherogenic dyslipidemia;

Model adjusted for age, sex, body mass index, smoking, hypertension, family history of coronary artery disease, Gensini score, left ventricular ejection fraction, low density lipoprotein cholesterol, and high sensitive C-reactive protein, and baseline statins;
